# Supplementary material for: A lipophilic “fully-anti” dodecamer from a (5′S)-5′,8-cyclo-2′-deoxyguanosine
Source: Royal Society of Chemistry journal article supplement (doi:10.1039/c4cc04275a), 2014-01-01
Supplement: c4cc04275a1.pdf [file c4cc04275a1.pdf]

- Supporting Information –

**A lipophilic “fully-*anti*” dodecamer from mutagenic (5'*S*)-5',8-cyclo-2'-deoxyguanosine**

Silvia Pieraccini,<sup>a</sup> Michael A. Terzidis,<sup>b</sup> Enrico J. Baldassarri,<sup>c</sup> Giovanna Fragneto,<sup>d</sup> Paolo Mariani,<sup>c</sup> Stefano Masiero, \*<sup>a</sup> and Chrysostomos Chatgililoglu\*<sup>b</sup>

a. Dipartimento di Chimica ‘Giacomo Ciamician’, Alma Mater Studiorum - Università di Bologna, via San Giacomo 11, 40126 Bologna, Italy.

b. Istituto per la Sintesi Organica e la Fotoreattività, Consiglio Nazionale delle Ricerche, Via P. Gobetti 101, 40129 Bologna, Italy.

c. Dipartimento di Scienze della Vita e dell’Ambiente, Università Politecnica delle Marche, Via Ranieri 65, Ancona, Italy.

d. Institut Laue-Langevin, BP 156 F-38042 Grenoble, France.

stefano.masiero@unibo.it  
chrys@isof.cnr.it

**Table of Contents**

|                                      |           |
|--------------------------------------|-----------|
| <b>A. Materials and methods.....</b> | <b>S2</b> |
| <b>B. CD measurements.....</b>       | <b>S3</b> |
| <b>C. NMR experiments .....</b>      | <b>S4</b> |

## A. Materials and methods.

Derivative **1** was prepared as reported in Terzidis, M. A.; Chatgililoglu, C. *Aust. J. Chem.* **2013**, *66*, 330. Chemicals were purchased from Aldrich Chemical Co. (Aldrich or Fluka catalogues) and used without further purification.

CD spectra were recorded on a JASCO J-715 Spectropolarimeter (path length = 0.01 cm).

NMR spectra were recorded on a Varian Inova (600 MHz) instrument equipped with either a direct or a reverse probe.

**SANS experiments** were performed at the D11 instrument (ILL, Grenoble, France). The used neutron wavelength  $\lambda$  was 6 Å and two sample-detector distances (8 and 1.2 m) were used in order to cover a  $Q$ -range ( $Q = (4\pi \sin \theta)/\lambda$ , where  $2\theta$  is the scattering angle) from 0.01 to 0.5 Å<sup>-1</sup>. Samples were measured at different temperatures in a 1 mm thick quartz cell. Raw data, obtained at different sample-to-detector distances, have been radially averaged, calibrated using transmission values and detector efficiency and transformed in absolute units (cm<sup>-1</sup>). Moreover, the CDCl<sub>3</sub> contribution corrected for the **1** volume fraction has been subtracted from the solution signal. The SANS curves report macroscopic differential scattering cross sections,  $I(Q)$ , measured as a function of the modulus of the momentum transfer. Fitting parameters are:  $Rc = 7.8 \pm 0.9$  Å,  $t = 4.5 \pm 0.8$  Å,  $L = 12.6 \pm 1.5$  Å,  $SLD_{core} = 4.34 \cdot 10^{-6}$  Å<sup>-2</sup> and  $SLD_{shell} = 2.02 \cdot 10^{-6}$  Å<sup>-2</sup> at 5°C;  $Rc = 7.7 \pm 1.0$  Å,  $t = 4.1 \pm 0.8$  Å,  $L = 12.7 \pm 1.3$  Å,  $SLD_{core} = 4.30 \cdot 10^{-6}$  Å<sup>-2</sup> and  $SLD_{shell} = 2.01 \cdot 10^{-6}$  Å<sup>-2</sup> at 25°C;  $Rc = 8.7 \pm 1.1$  Å,  $t = 4.1 \pm 0.5$  Å,  $L = 11.8 \pm 1.5$  Å,  $SLD_{core} = 4.29 \cdot 10^{-6}$  Å<sup>-2</sup> and  $SLD_{shell} = 2.02 \cdot 10^{-6}$  Å<sup>-2</sup> at 50°C.

**1-SrP<sub>2</sub> solutions.** CDCl<sub>3</sub> solutions containing the dodecameric complex (**1**-SrP<sub>2</sub> solutions) were prepared by solid-liquid extraction: 1 mL of **1** solution (8, 30 or 50 mM) was stirred with one equivalent (unless otherwise specified) of solid strontium picrate for four days at room temperature. The organic phase was then separated from the excess of solid salt by centrifugation, and used for CD, NMR or SANS investigations.

In titration experiments with cryptand [2.2.2], a **1**-SrP<sub>2</sub> CDCl<sub>3</sub> solution ([**1**] = 8 mM) was added with increasing amounts of solid cryptand. Subsequent titration with trifluoromethanesulfonic acid (Tf) was carried out by adding increasing amounts of a 35 mM CDCl<sub>3</sub> solution of the acid.

## B. CD measurements

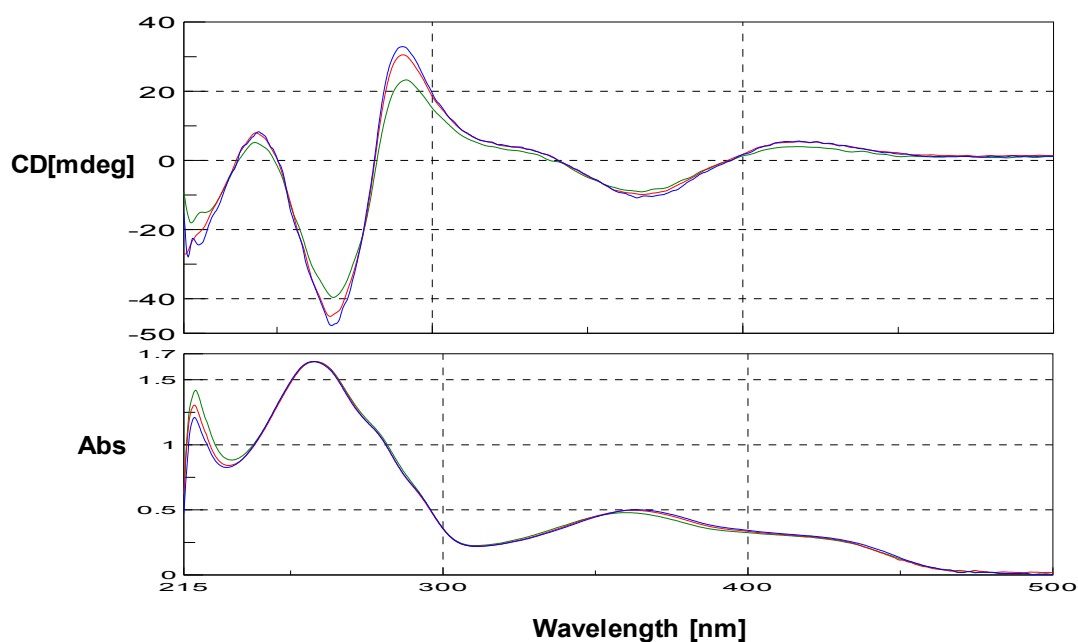

**Figure S1.** CD/UV spectra recorded at different temperatures on a  $\text{CDCl}_3$  solution of **1** (8 mM) after extraction of 1/6 eq. of  $\text{SrP}_2$ . Blue trace: 5°C; Red trace: 25°C; Green trace: 40°C.

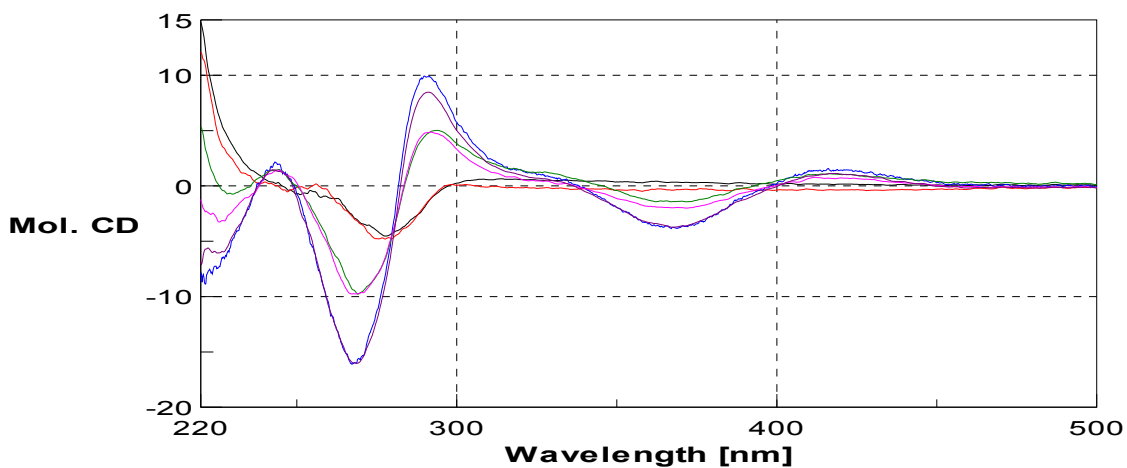

**Figure S2.** CD spectra recorded in  $\text{CDCl}_3$  at 25°C. Black trace: **1** 8 mM; blue trace (solution  $S_0$ ): **1** 8 mM after solid-liquid extraction of 1/6 eq. of  $\text{SrP}_2$ ; Pink trace: solution  $S_0$  added with 1/2 eq. of cryptand [2.2.2] relative to  $\text{Sr}^{2+}$ ; Red trace (solution  $S_1$ ): solution  $S_0$  added with 1 eq. of cryptand [2.2.2] relative to  $\text{Sr}^{2+}$ ; Green trace: solution  $S_1$  added with 1/2 eq. of Htf relative to [2.2.2]; Violet trace: solution  $S_1$  added with 1 eq. of Htf relative to [2.2.2].

### C. NMR experiments

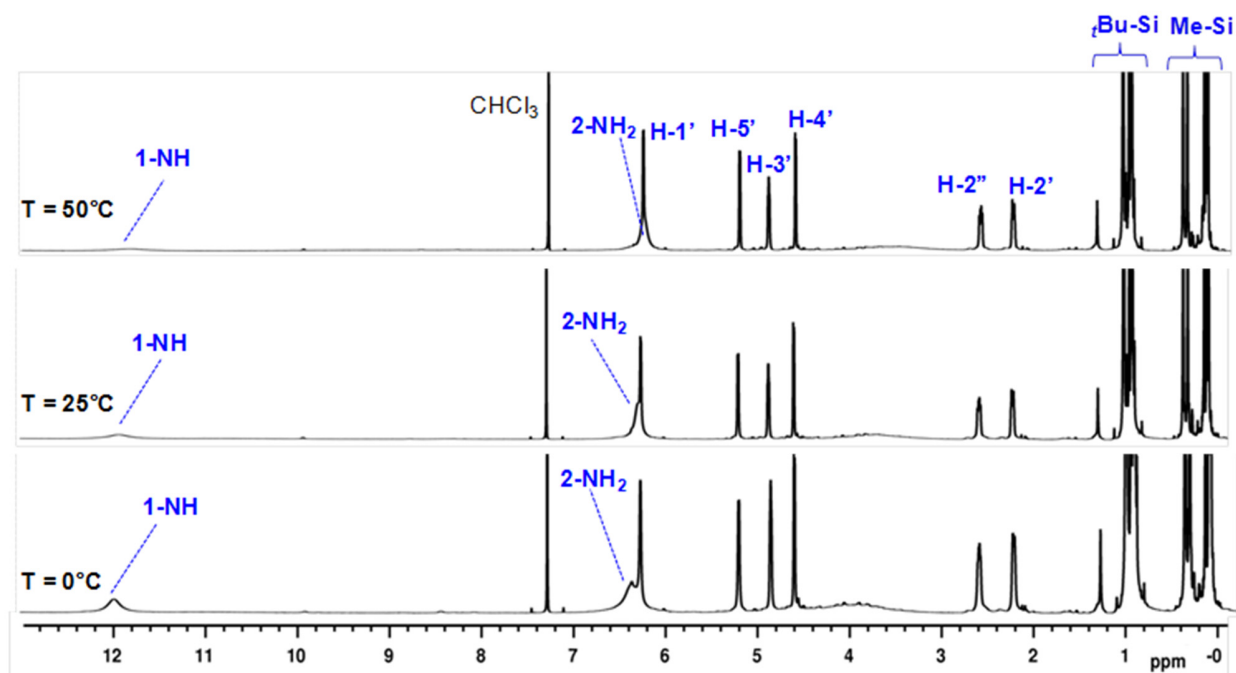

**Figure S3.**  $^1\text{H}$  NMR spectra recorded on **1** in  $\text{CDCl}_3$  (30 mM) at different temperatures. Peaks are assigned as reported in Terzidis, M. A.; Chatgililoglu, C. *Aust. J. Chem.* **2013**, 66, 330.

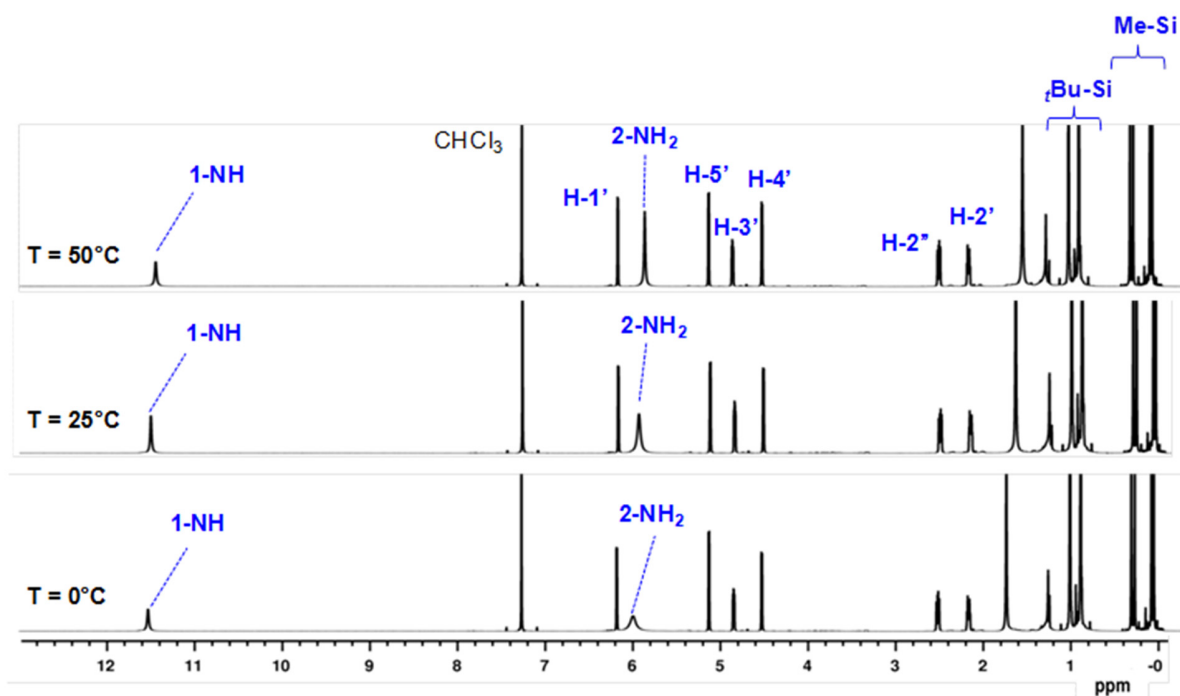

**Figure S4.**  $^1\text{H}$  NMR spectra recorded on **1** in  $\text{CDCl}_3$  (8 mM) at different temperatures. Peaks are assigned as reported in Terzidis, M. A.; Chatgililoglu, C. *Aust. J. Chem.* **2013**, 66, 330.

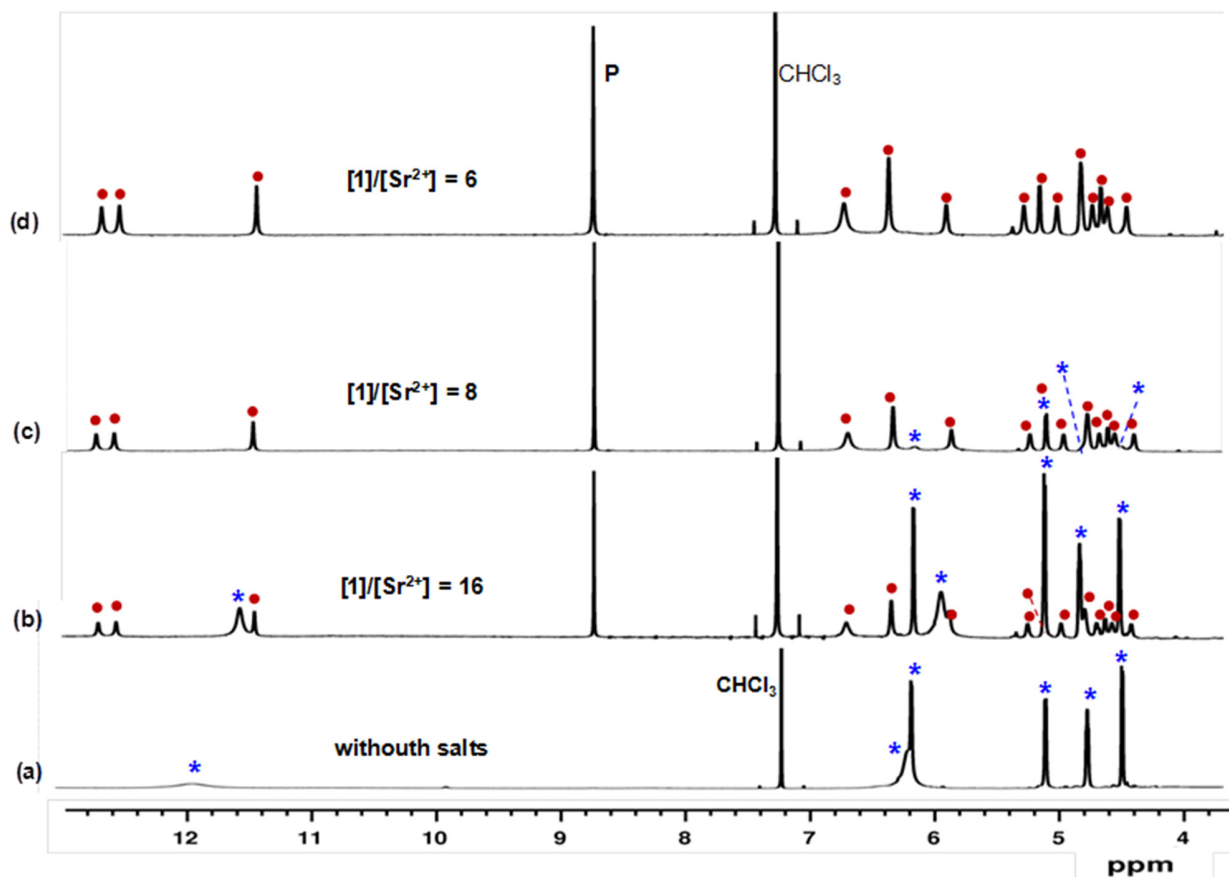

**Figure S5.**  $^1\text{H}$  NMR spectra recorded at 25°C in  $\text{CDCl}_3$ . Spectrum (a): initial solution  $\text{Si}$  containing **1** 30 mM. Spectra (b)-(d): solutions obtained from  $\text{Si}$  by solid-liquid extraction of  $\text{SrP}_2$ , performed in the presence of (b) 1/16 eq., (c) 1/8 eq., (d)  $\geq 1/6$  eq. of salt relative to **1**. Blue asterisks: **1** signals; red dots: **D** signals. The picrate anion is labeled with “P”.

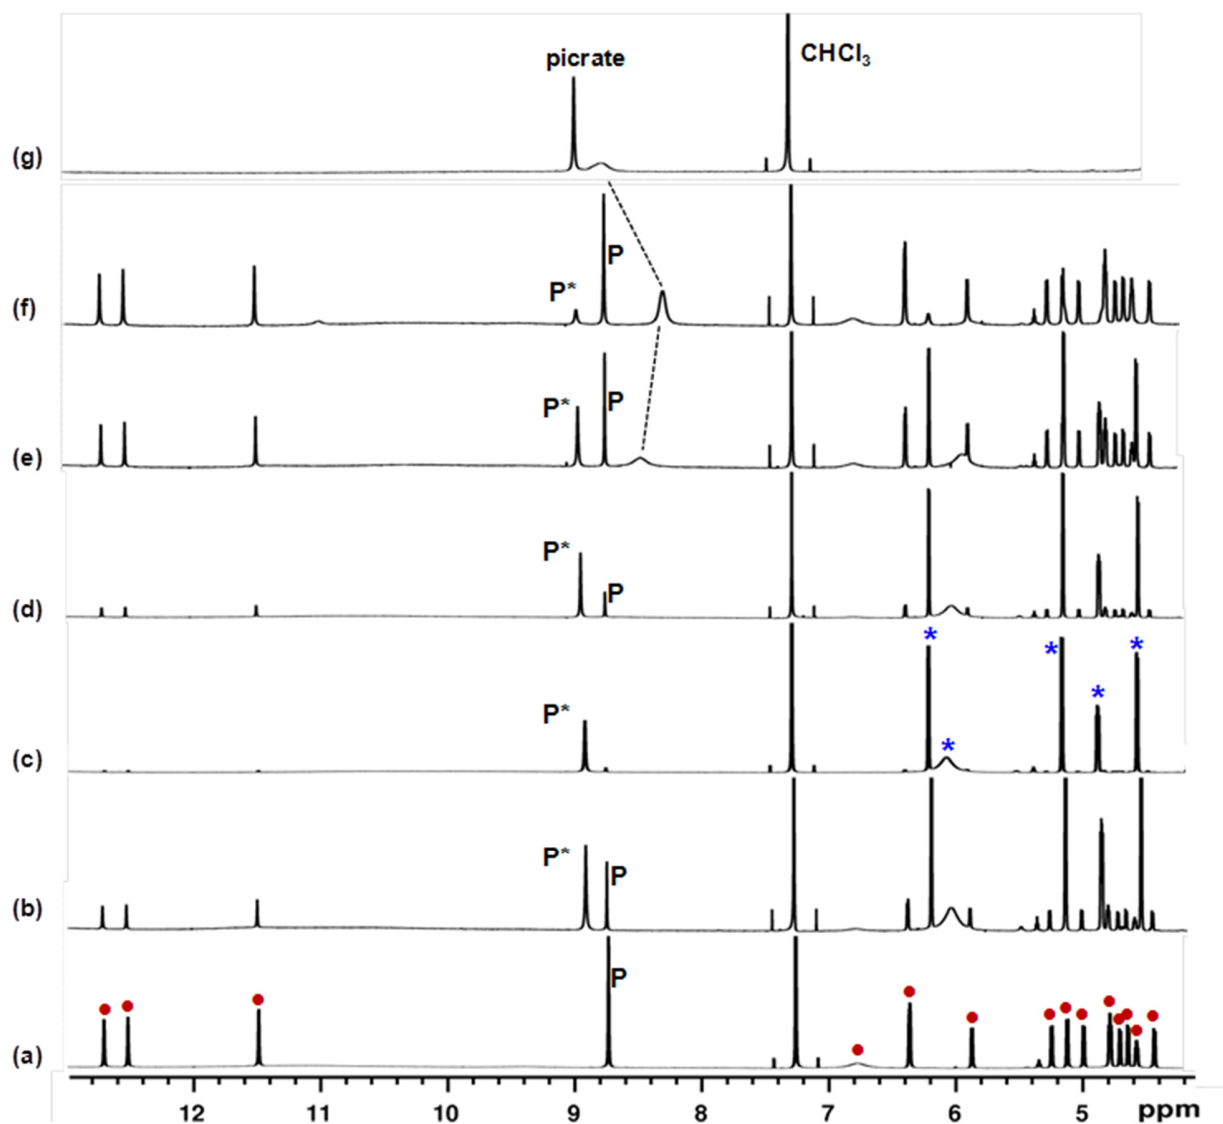

**Figure S6.**  $^1\text{H}$  NMR spectra recorded in  $\text{CDCl}_3$  at  $0^\circ\text{C}$ . (a) initial solution  $\text{S}_i$ , containing **1** (8 mM) and 1/6 eq. of  $\text{SrP}_2$ ; (b) solution  $\text{S}_i$  added with 0.75 eq. of [2.2.2] relative to  $\text{Sr}^{2+}$ ; (c) solution  $\text{S}_1$ , obtained by solution  $\text{S}_i$  added with 1 eq. of [2.2.2] relative to  $\text{Sr}^{2+}$ ; (d) solution  $\text{S}_1$  added with 0.25 eq. of Htf relative to [2.2.2]; (e) solution  $\text{S}_1$  added with 0.5 eq. of Htf relative to [2.2.2]; (f) solution  $\text{S}_1$  added with 1 eq. of Htf relative to [2.2.2] (from integration uncomplexed [**1**]  $\leq 10\%$ ).

Red dots: **D** signals; blue asterisks: **1** signals; “P”: picrate counterion of the **D** species; “P\*”: picrate counterion of cryptate [ $\text{Sr}^{2+} \subset 2.2.2$ ].

The broad resonance appearing at  $8\div 8.5$  ppm in spectra (e) and (f) can be ascribed to protonation of cryptand [2.2.2]. See for comparison spectrum (g).

(g)  $\text{CDCl}_3$  solution of cryptand [2.2.2] (1.3 mM) upon solid-liquid extraction of  $\text{SrP}_2$  (performed with an excess of salt), and added with 0.5 eq. of Htf (relative to cryptand). Spectrum is recorded at  $25^\circ\text{C}$ .

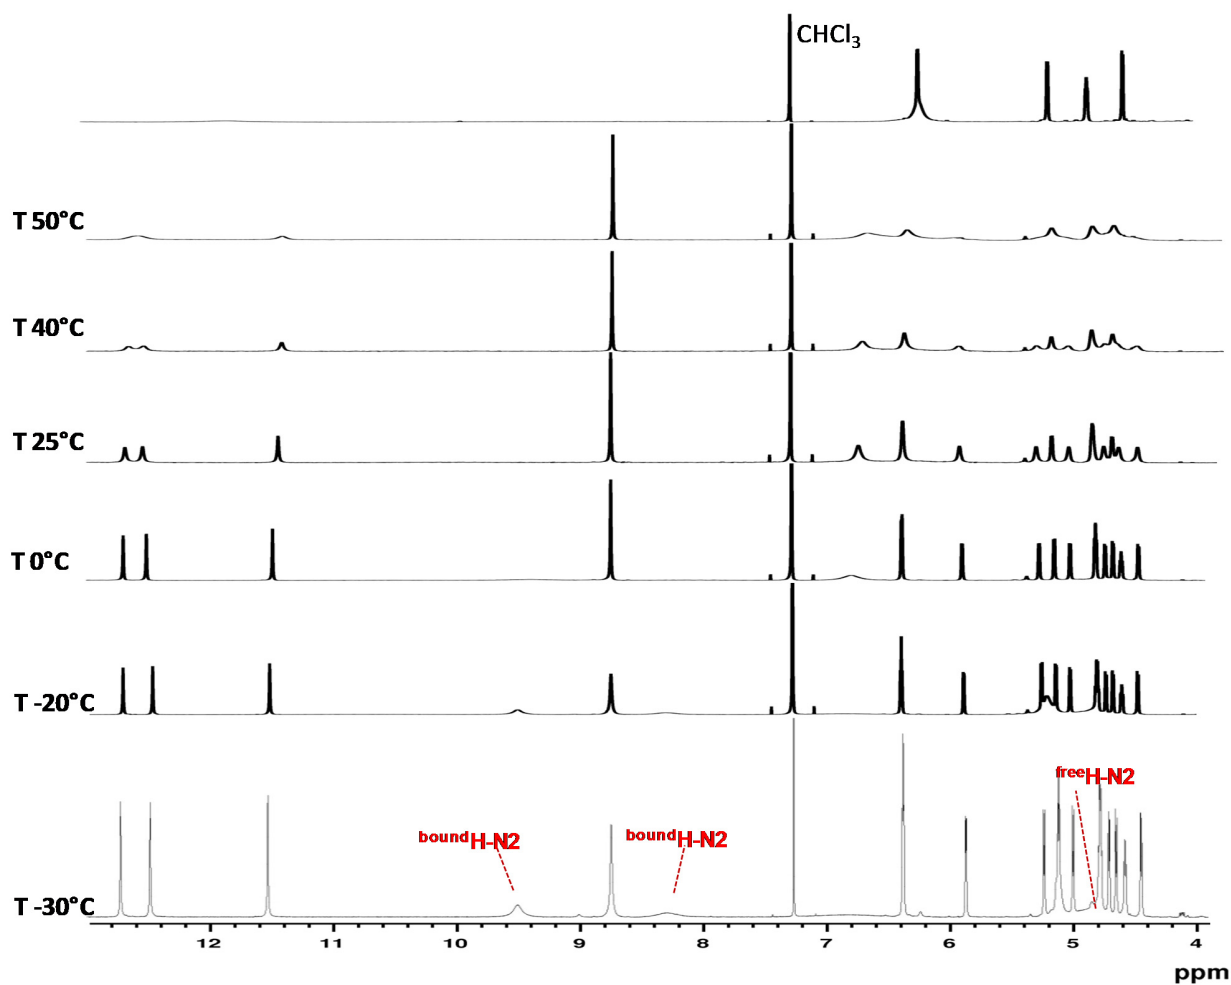

**Figure S7.**  $^1\text{H}$  NMR experiments, recorded at different temperatures, on a 30 mM  $\text{CDCl}_3$  solution of **1** after solid-liquid extraction of  $\text{SrP}_2$  (1/6 eq. relative to **1**). In the upper part, spectrum of **1** (30 mM) is reported for comparison. For assignment of amino protons see Figure S8.

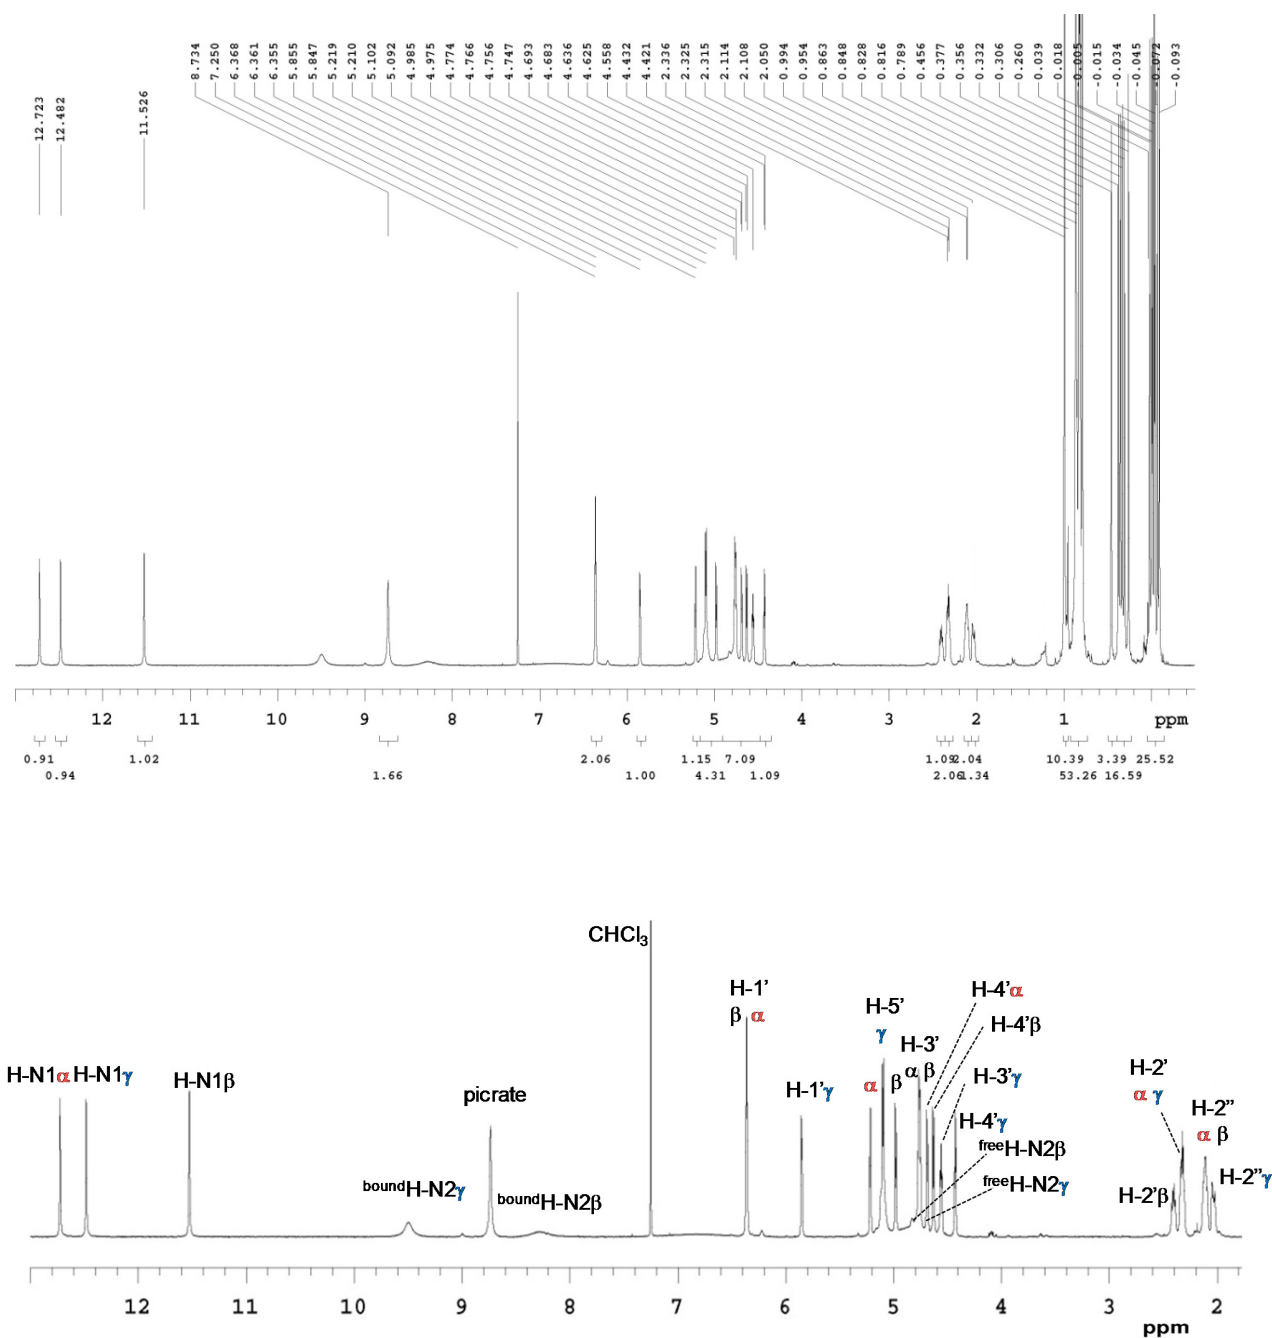

**Figure S8.** Top:  $^1\text{H}$  NMR spectrum of **1**/SrP<sub>2</sub> 6:1 in  $\text{CDCl}_3$  at  $-20^\circ\text{C}$  ( $[\textbf{1}] = 30 \text{ mM}$ ). Bottom: expansion of the 1.8-13 ppm interval of the same spectrum.

|           | $\alpha$ | $\beta$ | $\gamma$    |
|-----------|----------|---------|-------------|
| H1'       | 6.35     | 6.37    | 5.85        |
| H2'       | 2.33     | 2.40    | 2.32        |
| H2''      | 2.12     | 2.10    | 2.03        |
| H3'       | 4.77     | 4.76    | 4.56        |
| H4'       | 4.69     | 4.63    | 4.43        |
| H5'       | 5.21     | 5.10    | 4.98        |
| HN1       | 12.72    | 11.52   | 12.48       |
| bound HN2 | *        | 8.3     | 9.5         |
| free HN2  | *        | 4.9     | 4.8         |
| C2        | 153.91   | 153.77  | 152.78 n.a. |
| C4        | 149.75   | 148.32  | 147.12 n.a. |
| C5        | 115.07   | 115.86  | 114.28      |
| C6        | 159.53   | 157.02  | 159.17      |
| C8        | 144.24   | 143.01  | 144.65      |
| C1'       | 84.70    | 84.51   | 84.51       |
| C2'       | 45.18    | 45.52   | 45.85       |
| C3'       | 69.35    | 69.16   | 69.07       |
| C4'       | 86.63    | 86.71   | 86.27       |
| C5'       | 65.81    | 65.19   | 65.15       |

\* protons are supposed to be exchanged-broadened into the baseline

n.a. = not assigned

**Table S1.**  $^1\text{H}$  and  $^{13}\text{C}$  chemical shifts for **D** signals (relative to residual  $\text{CHCl}_3$  – 7.25 and 77.0 ppm, respectively).

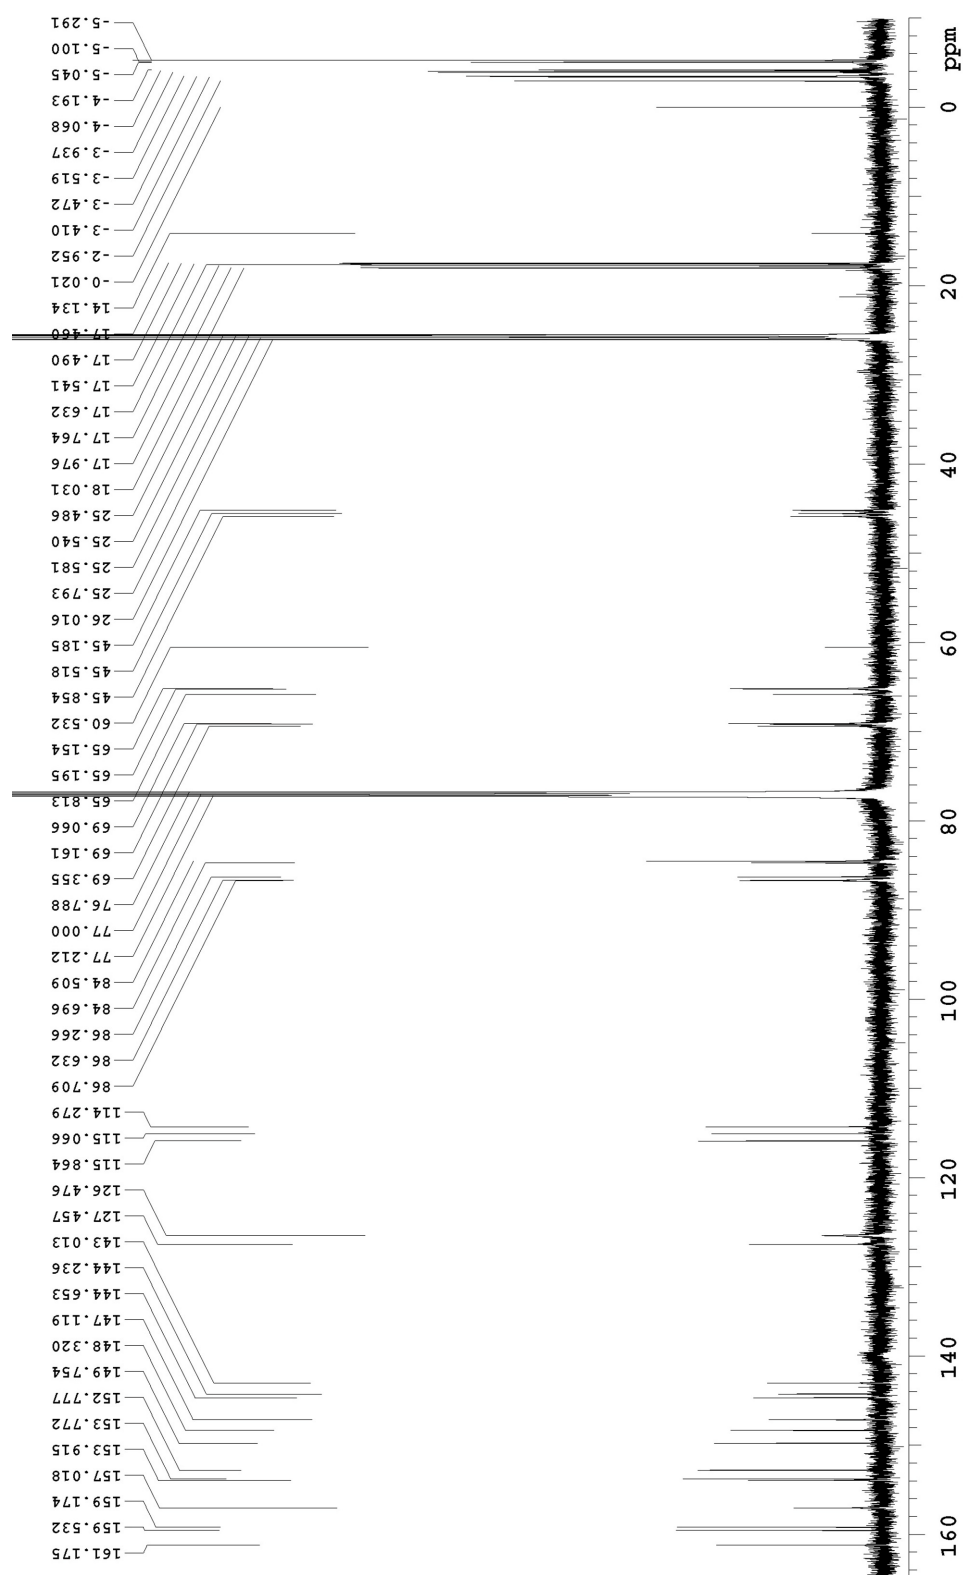

**Figure S9.** <sup>13</sup>C NMR spectrum of 1/SrP<sub>2</sub> 6:1 in CDCl<sub>3</sub> at -19°C ([1] = 30 mM).

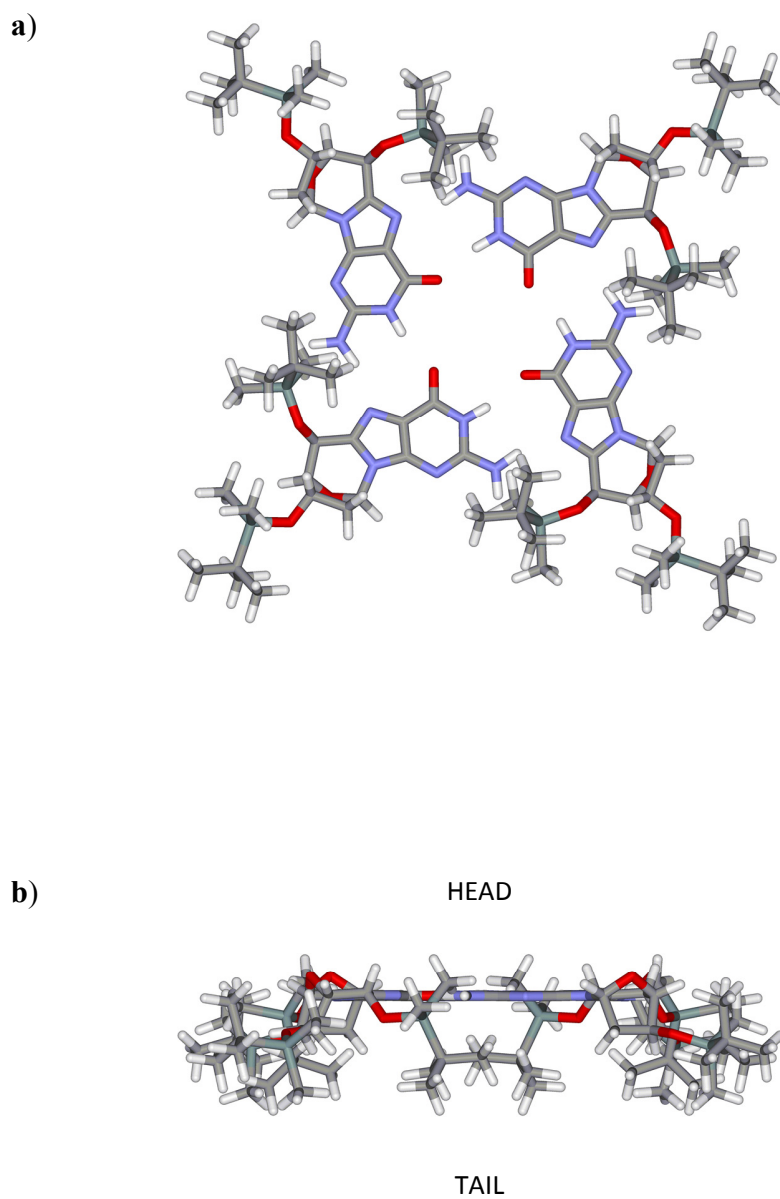

**Figure S10.** a) Top view of a G-quartet formed by **1**, seen from the *tail* face. b) Side view of the same quartet.

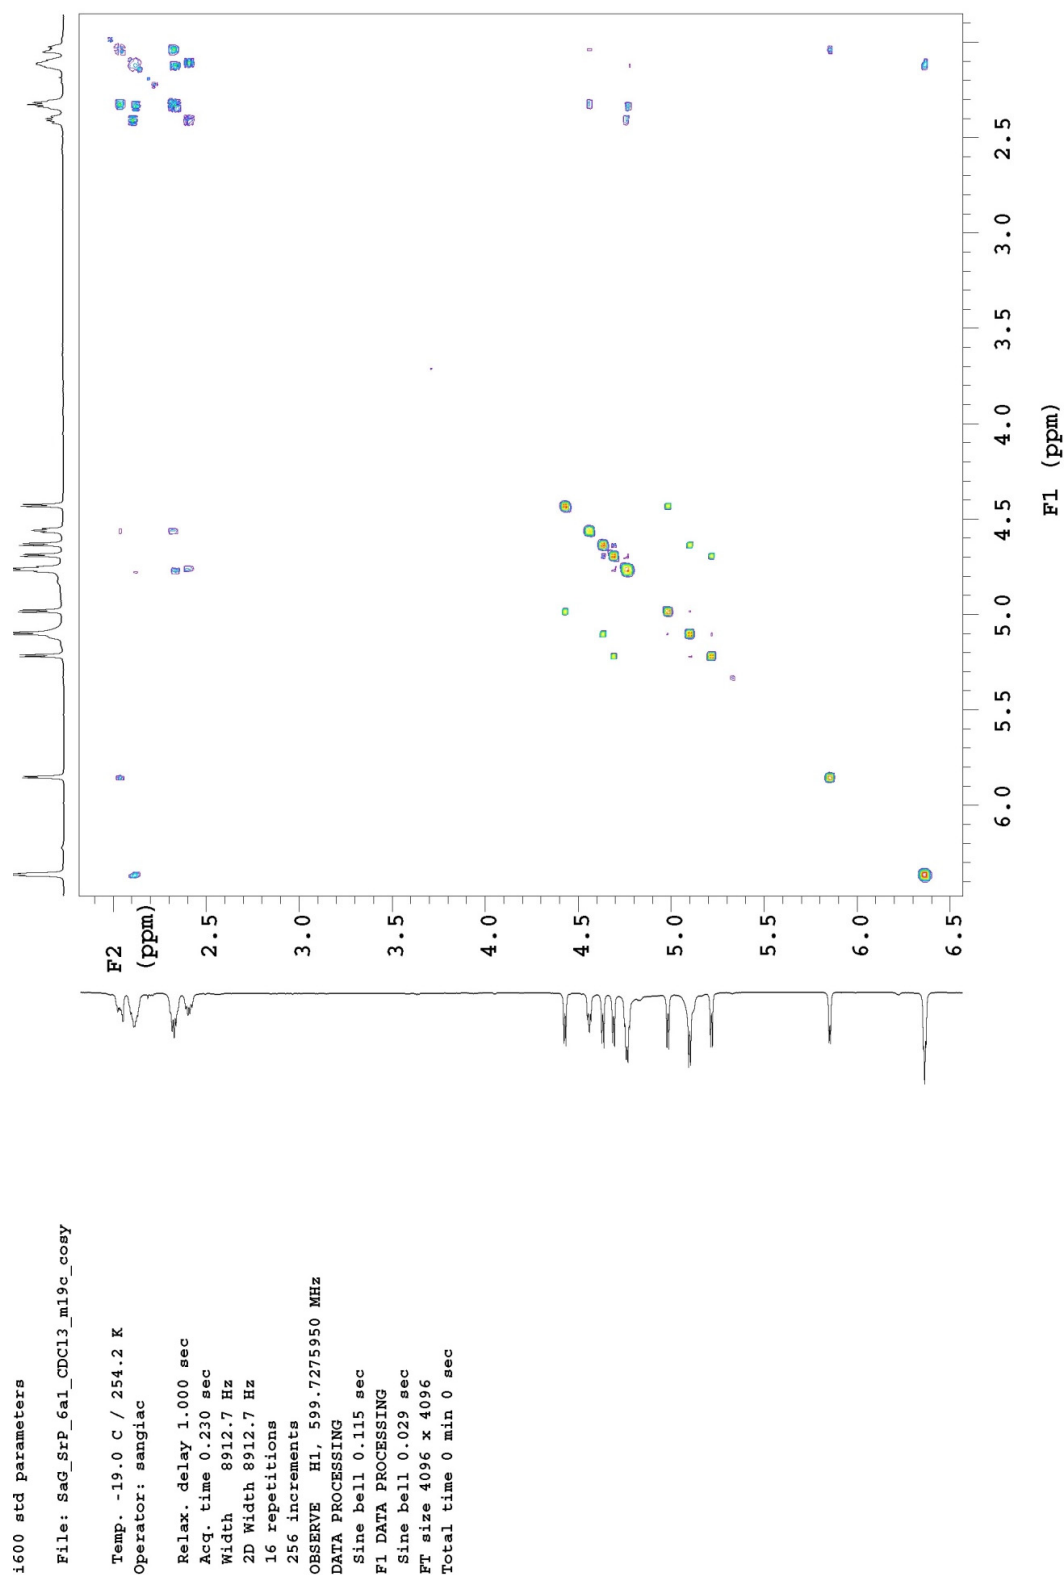

**Figure S11.** Sugars region of the gCOSY spectrum of **1**/SrP<sub>2</sub> 6:1 in CDCl<sub>3</sub> at -19°C ([**1**] = 30 mM).

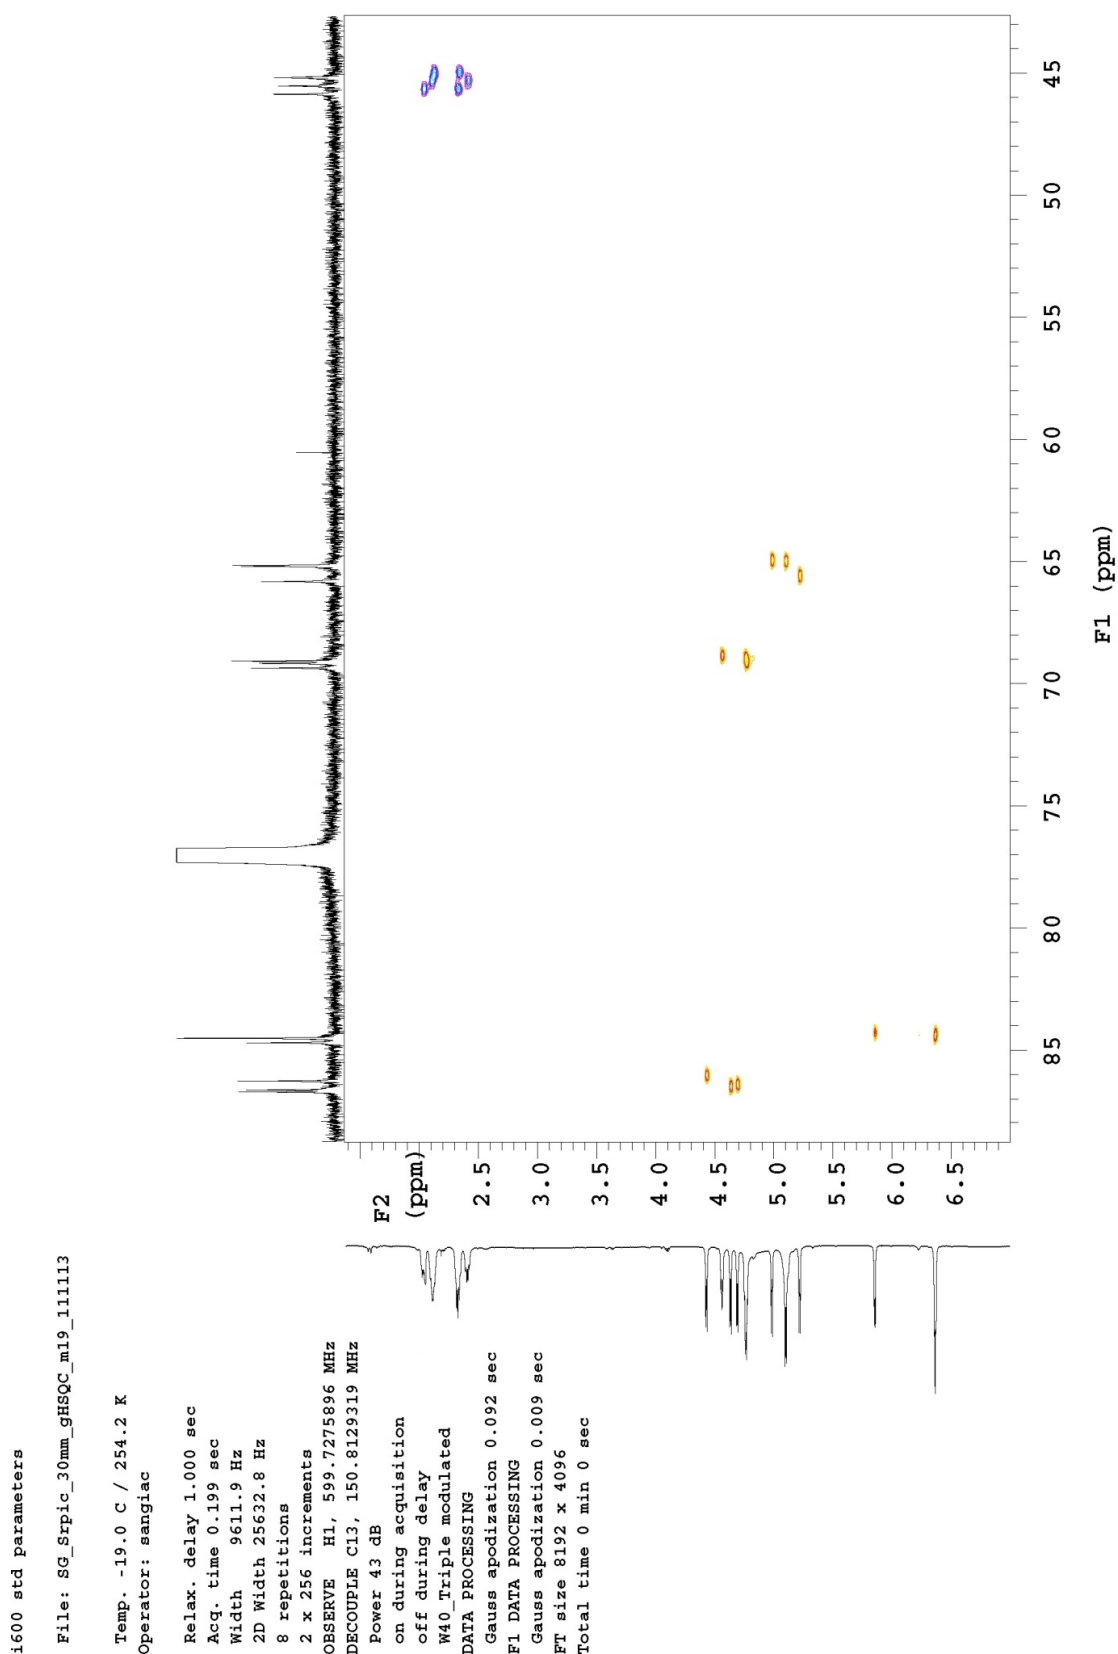

**Figure S12.** Sugars region of the gHSQC spectrum of 1/SrP 6:1 in CDCl<sub>3</sub> at -19°C ([1] = 30 mM).

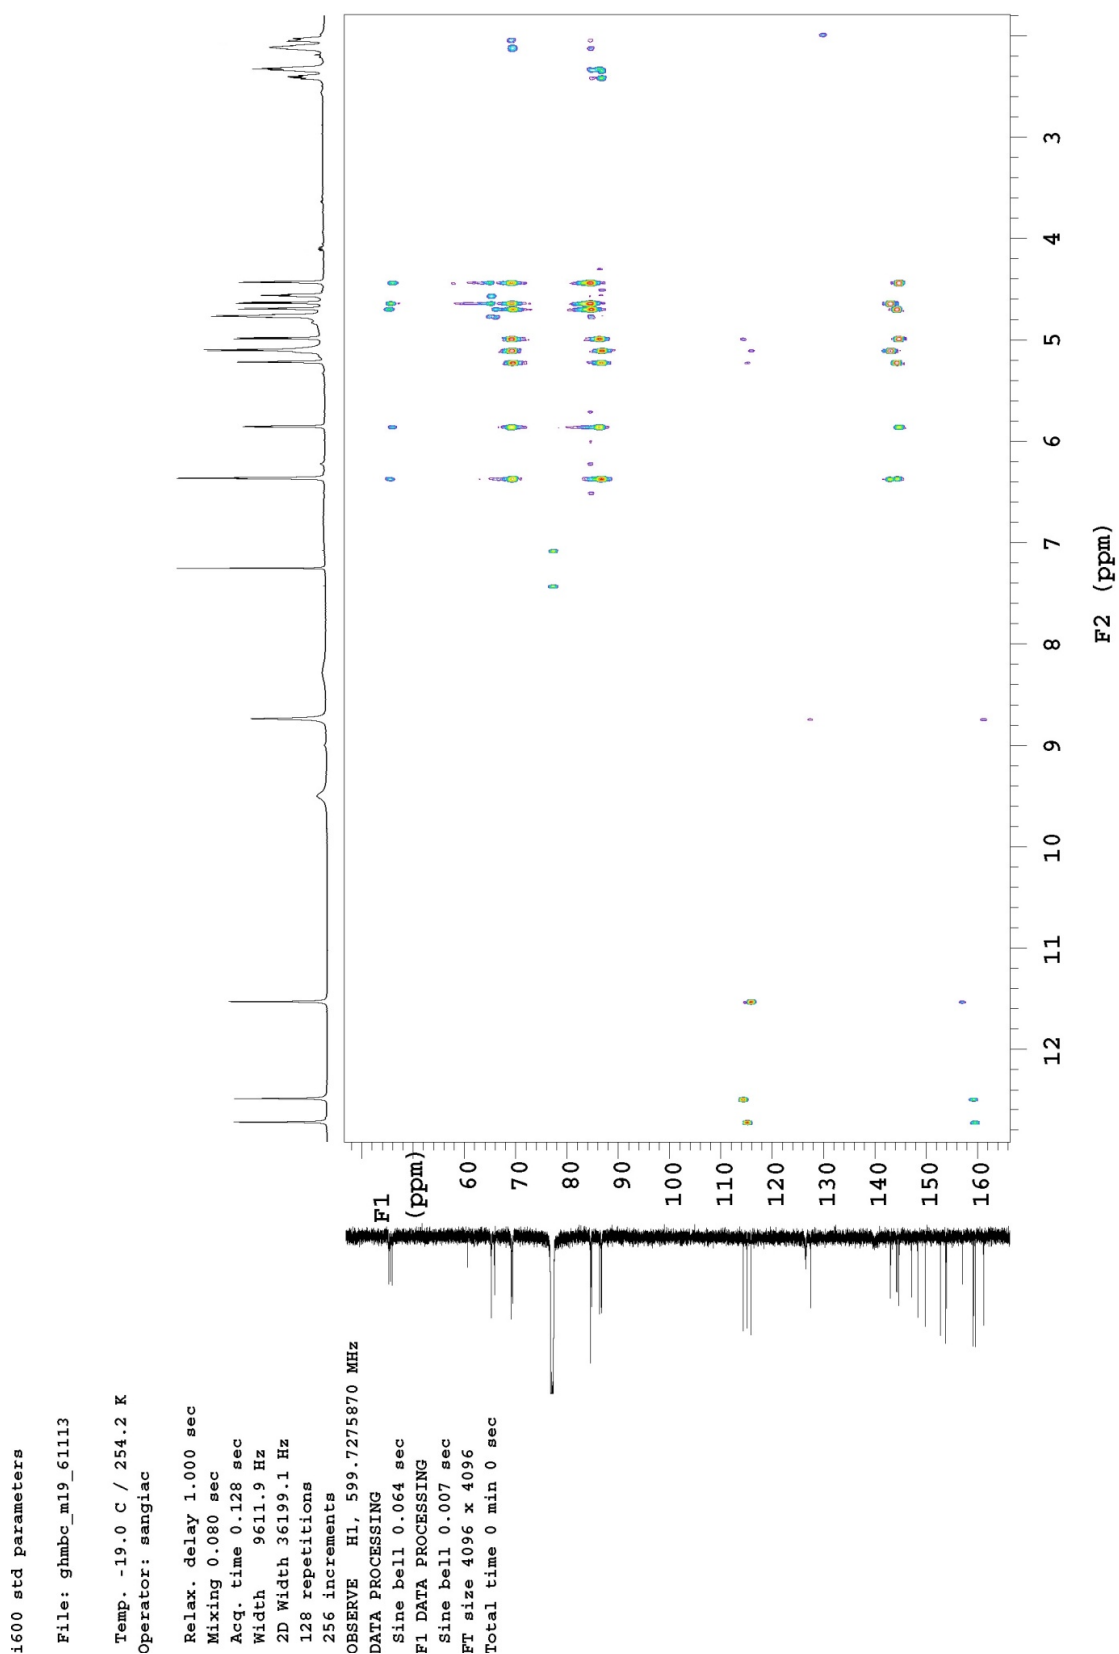

**Figure S13.** Sugars region of the gHMBC spectrum of **1**/SrP 6:1 in CDCl<sub>3</sub> at -19°C ([**1**] = 30 mM).

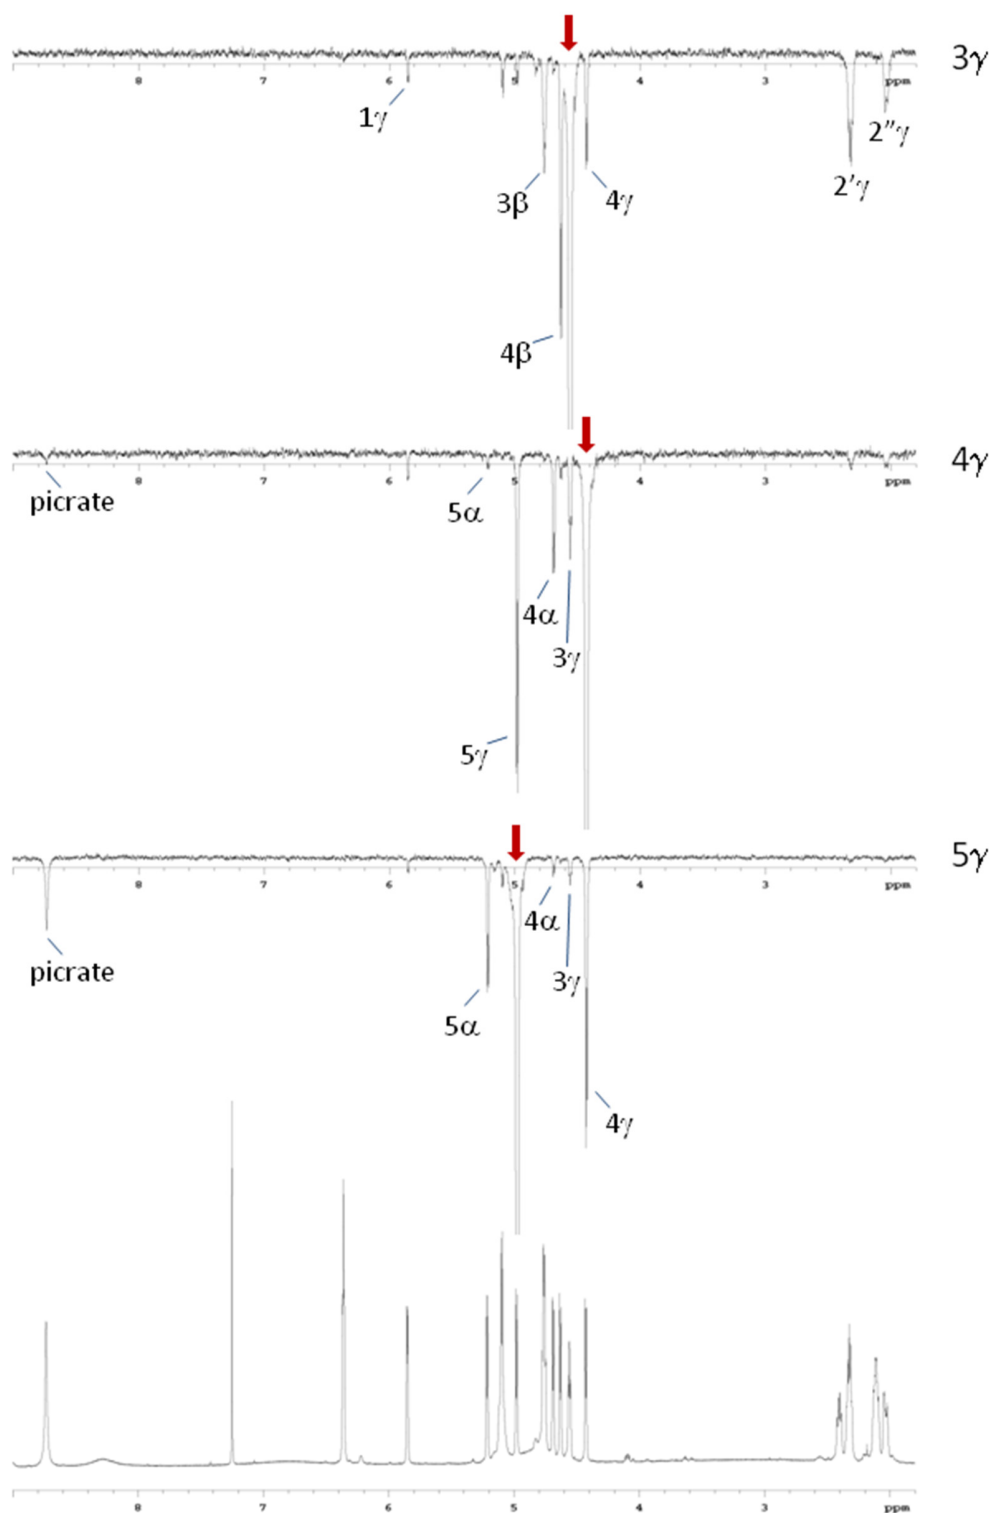

**Figure S14.** Noesy1d spectra recorded at -19°C on 1/SrP 6:1 in CDCl<sub>3</sub> ([1] = 30 mM). Mixing time 300 ms, 256 scans, a shaped (50 Hz) pulse centered at the peak of interest was used for resonance selection.

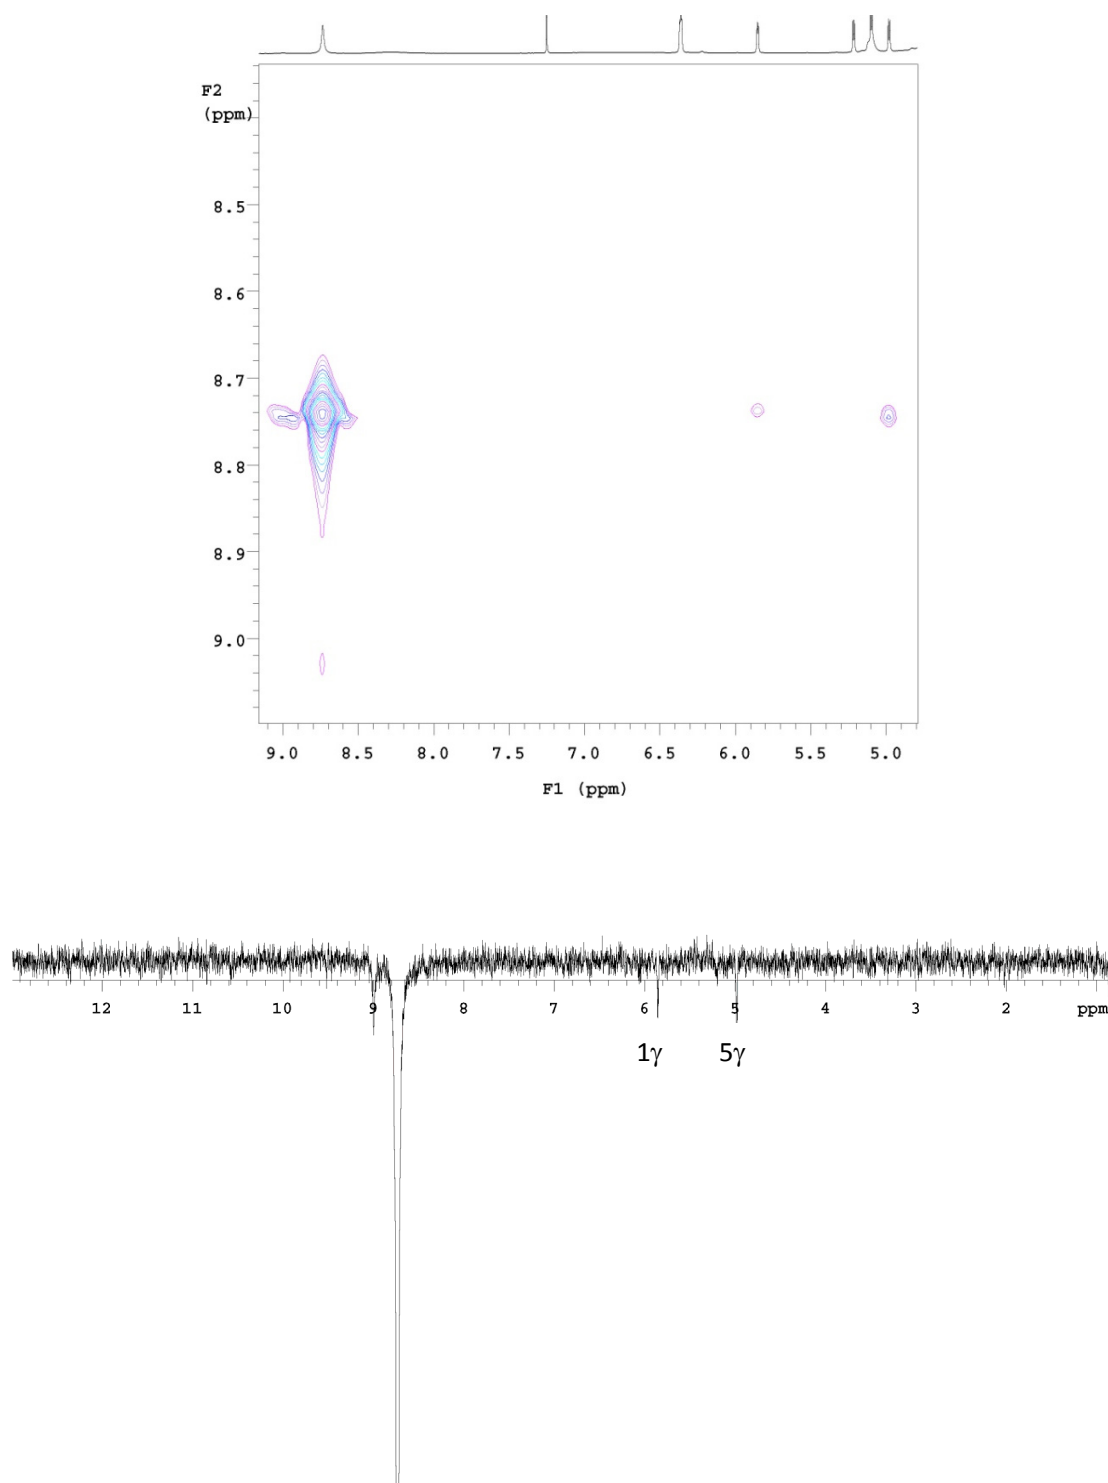

**Figure S15.** Portion of the 2D-noesy (top) and 1D-noesy spectra showing contacts between picrate protons and H1'γ / 5'γ.
